# Supplementary material for: FOXP3 and CTLA4 overexpression in multiple myeloma bone marrow as a sign of accumulation of CD4+ T regulatory cells
Source: Springer Nature journal article supplement (doi:10.1007/s00262-014-1589-9), 2014-08-06
Supplement: MOESM1 [file 8232728]

## Supplementary Figure 1

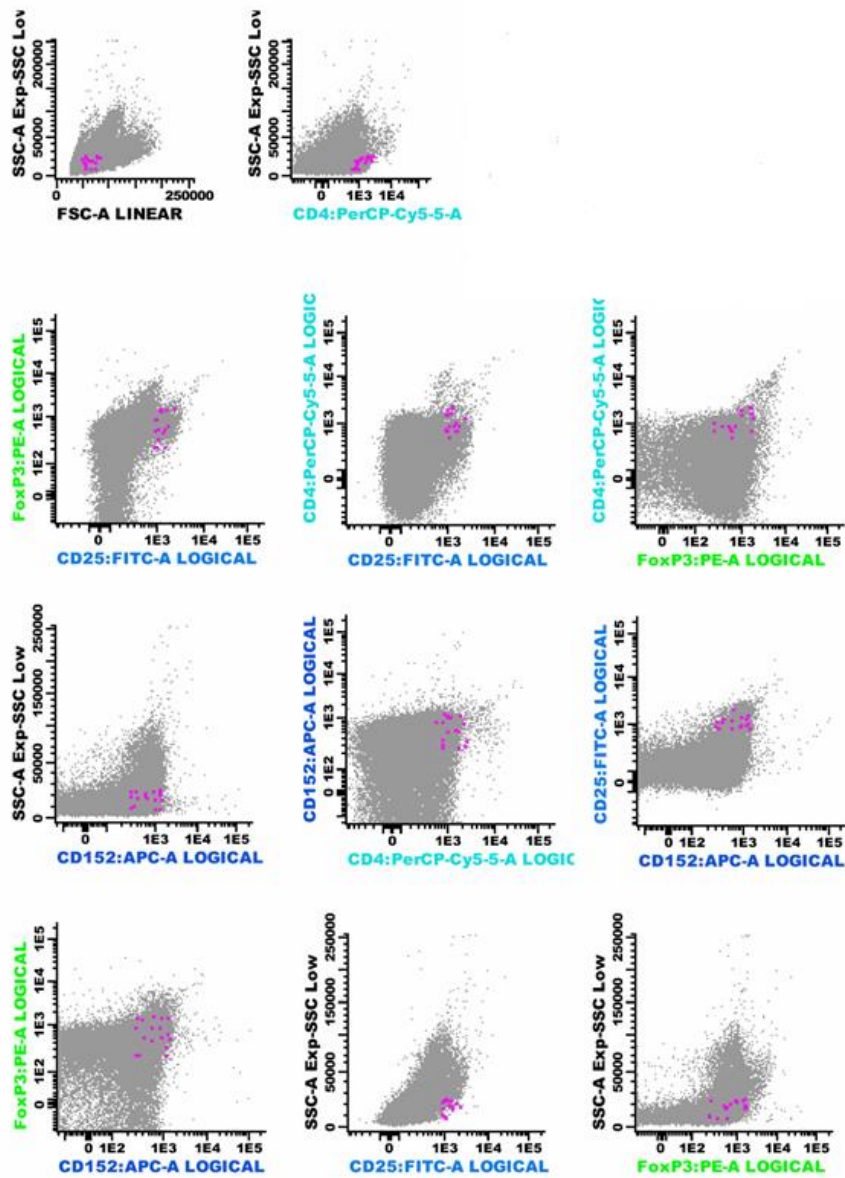

**Supplementary Figure 1 A** - Analysis of Treg cells by flow cytometry in total bone marrow aspirate: CD3+CD4+CD25highFOXP3+CTLA4(CD152)+ cells in a solitary plasmacytoma case.

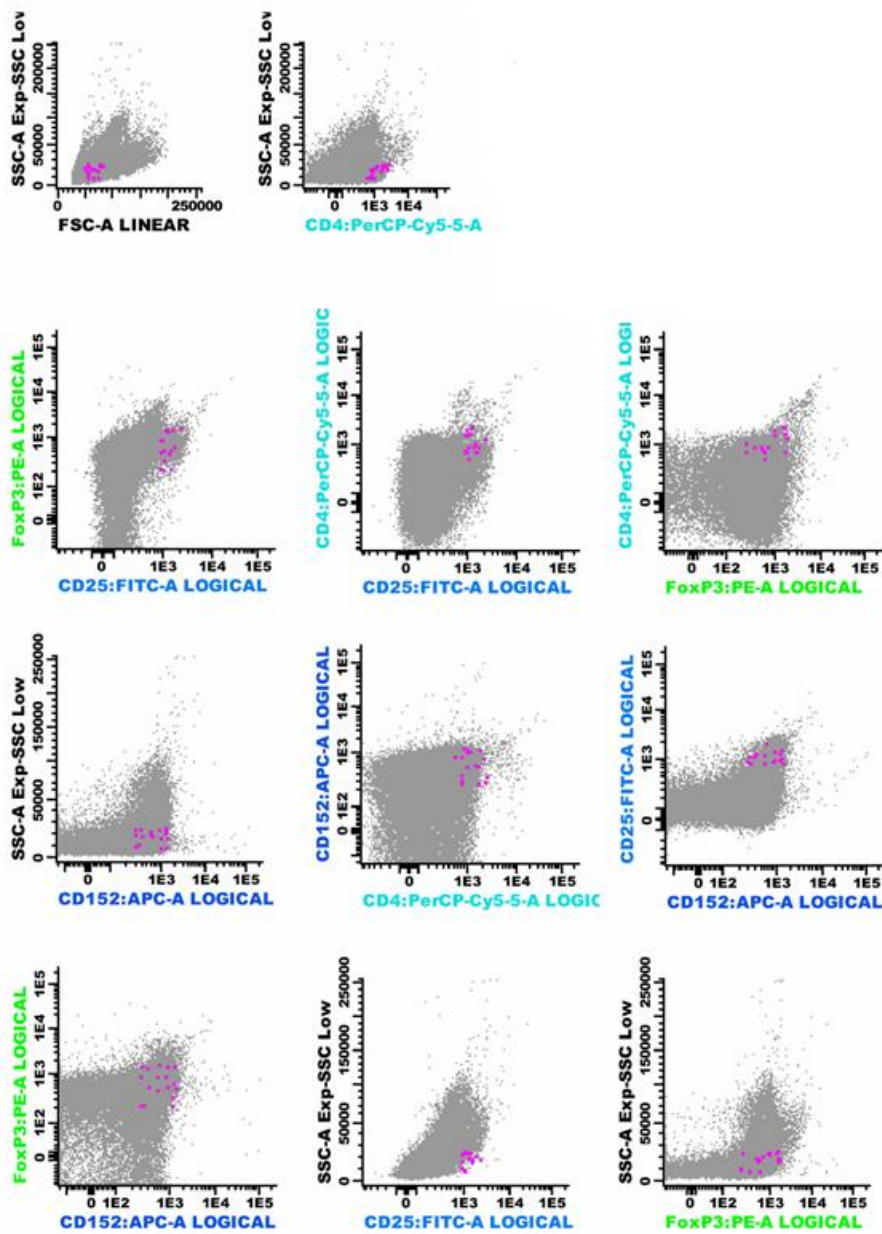

**Supplementary Figure 1 B** - Analysis of Treg cells by flow cytometry in total bone marrow aspirate: CD3+CD4+CD25highFOXP3+CTLA4(CD152)+ cells in a healthy donor sample.

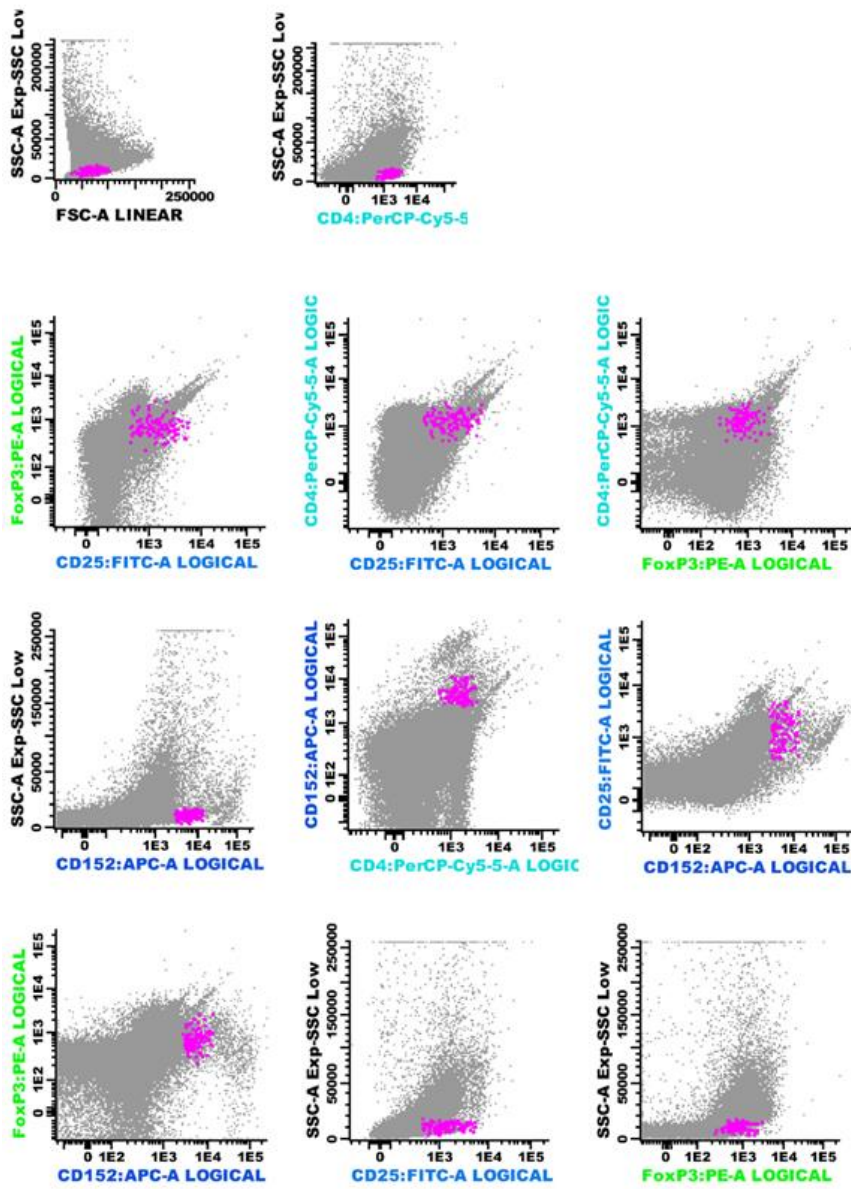

**Supplementary Figure 1 C** - Analysis of Treg cells by flow cytometry in total bone marrow aspirate: CD3+CD4+CD25highFOXP3+CTLA4(CD152)+ in a multiple myeloma case.
